# Supplementary material for: Online estimation of discrete, continuous, and conditional joint densities using classifier chains
Source: Springer Nature journal article supplement (doi:10.1007/s10618-017-0546-6), 2017-11-25
Supplement: 10618_2017_546_MOESM3_ESM.pdf [file 10618_2017_546_MOESM3_ESM.pdf]

**Noname manuscript No.**  
(will be inserted by the editor)

---

## **Online Estimation of Discrete, Continuous, and Conditional Joint Densities using Classifier Chains**

**Michael Geilke · Andreas Karwath · Eibe Frank · Stefan Kramer**

the date of receipt and acceptance should be inserted later

---

Michael Geilke (✉) · Andreas Karwath · Stefan Kramer  
Johannes Gutenberg-Universität Mainz, Staudingerweg 9, 55128 Mainz, Germany  
E-mail: {geilke,karwath,kramer}@informatik.uni-mainz.de  
Phone: +49-6131-39-21058, Fax: +49-6131-39-23534

Eibe Frank  
Department of Computer Science, The University of Waikato, Hamilton 3240, New Zealand  
E-mail: eibe@cs.waikato.ac.nz

### Online Resource 3

We compared  $EDO_{CC}(MC)$  with oKDE on five publicly available datasets: letter, electricity, shuttle, covertime, adult. oKDE had problems with the covertime and adult dataset: Either it was not able to complete a single job within twelve hours (covertime) or showed warnings regarding matrix computations (adult).

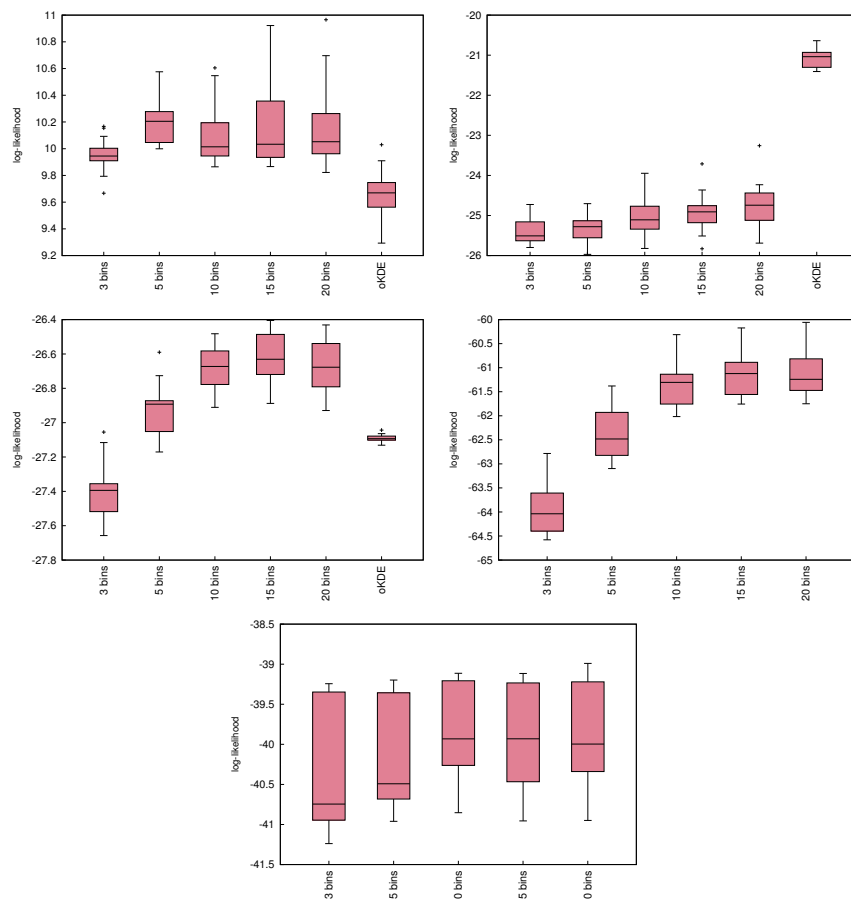

**Fig. 1**  $EDO_{CC}(MC)$  compared with oKDE on the datasets Electricity (row one, left), Shuttle (row one, right), Letter (row two, left), Covertime (row two, right), and adult (last row). On the y-axis is the average log-likelihood (computed prequentially).  $i$  bins with  $i \in \{3, 5, 10, 15, 20\}$  stands for the number of bins used for discretizing the class attribute.
